# Supplementary material for: Modelling the Economic Impact of lnfluenza Vaccine Programs with the Cell-Based Quadrivalent Influenza Vaccine and Adjuvanted Trivalent Influenza Vaccine in Canada
Source: MDPI journal article supplement (doi:10.3390/vaccines10081257), 2022-08-04

## Supplementary Materials

**Supplementary Table S1.** 2021 population estimates in Canada per age group.

| Age Group   | Population |
|-------------|------------|
| 6–23 months | 548,840    |
| 2–3 years   | 761,582    |
| 4–8 years   | 2,022,787  |
| 9–17 years  | 3,717,961  |
| 18–24 years | 3,298,064  |
| 25–29 years | 2,640,110  |
| 30–34 years | 2,697,788  |
| 35–39 years | 2,666,647  |
| 40–44 years | 2,509,664  |
| 45–49 years | 2,384,473  |
| 50–54 years | 2,430,334  |
| 55–59 years | 2,700,181  |
| 60–64 years | 2,606,885  |
| 65–69 years | 2,233,993  |
| 70–74 years | 1,853,536  |
| 75+ years   | 2,994,263  |

**Supplementary Table S2.** Calibrated influenza attack rate for individual influenza strains, based on the observed strain observation in Canada and incidence rates in the US during each year [23,25].

| <b>Year</b> | <b>A/H1N1</b> | <b>A/H3N2</b> | <b>B Victoria</b> | <b>B Yamagata</b> | <b>TOTAL</b> |
|-------------|---------------|---------------|-------------------|-------------------|--------------|
| 2012        | 0.95%         | 6.19%         | 0.85%             | 0.48%             | 8.48%        |
| 2013        | 5.15%         | 0.33%         | 1.03%             | 0.94%             | 7.43%        |
| 2014        | 0.08%         | 5.88%         | 1.41%             | 0.00%             | 7.37%        |
| 2015        | 3.82%         | 0.41%         | 1.11%             | 0.51%             | 5.85%        |
| 2016        | 0.06%         | 6.16%         | 0.58%             | 0.23%             | 7.03%        |
| 2017        | 0.57%         | 4.97%         | 3.86%             | 0.47%             | 9.87%        |
| 2018        | 4.48%         | 2.10%         | 0.27%             | 0.10%             | 6.94%        |
| 2019        | 3.30%         | 1.51%         | 3.48%             | 0.06%             | 8.34%        |

**Supplementary Table S3.** Assumed vaccine coverage rates for the general population and high-risk individuals, by age group.

| Age Group   | General Population | High Risk |
|-------------|--------------------|-----------|
| 6–23 months | 29%                | 29%       |
| 2–3 years   | 29%                | 29%       |
| 4–8 years   | 29%                | 29%       |
| 9–17 years  | 29%                | 29%       |
| 18–24 years | 29%                | 29%       |
| 25–29 years | 29%                | 29%       |
| 30–34 years | 29%                | 29%       |
| 35–39 years | 29%                | 29%       |
| 40–44 years | 29%                | 29%       |
| 45–49 years | 29%                | 29%       |
| 50–54 years | 29%                | 29%       |
| 55–59 years | 47%                | 47%       |
| 60–64 years | 47%                | 47%       |
| 65–69 years | 75%                | 75%       |
| 70–74 years | 75%                | 75%       |
| 75+ years   | 75%                | 75%       |

**Supplementary Figure S1.** Probabilistic sensitivity analysis of three scenarios compared with baseline (QIVe for all age groups) assuming three egg-adapted seasons. Costs are presented in Canadian dollars.

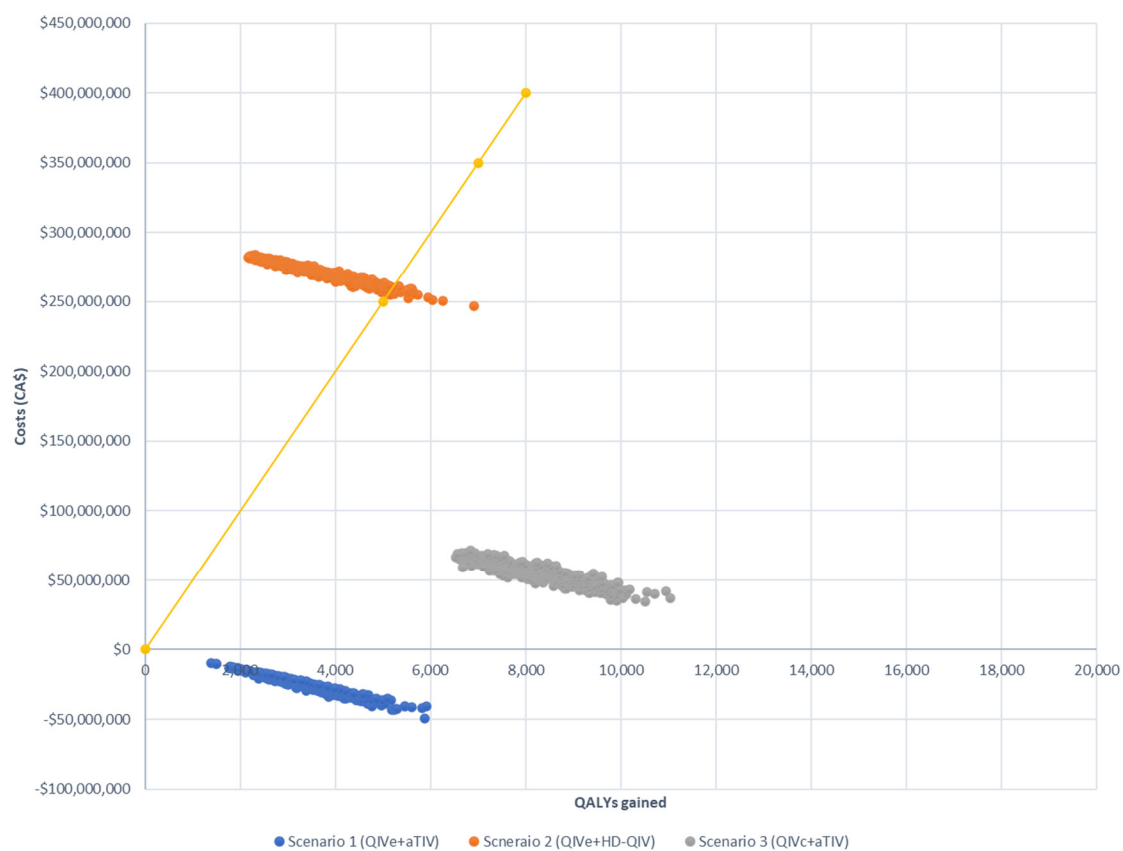

Yellow line indicates the willingness to pay threshold (CA\$ 50,000)

**Supplementary Figure S2.** ICER acceptability curve for each of the three scenarios, assuming three egg-adapted seasons. Threshold for cost-effectiveness was CA\$50,000.

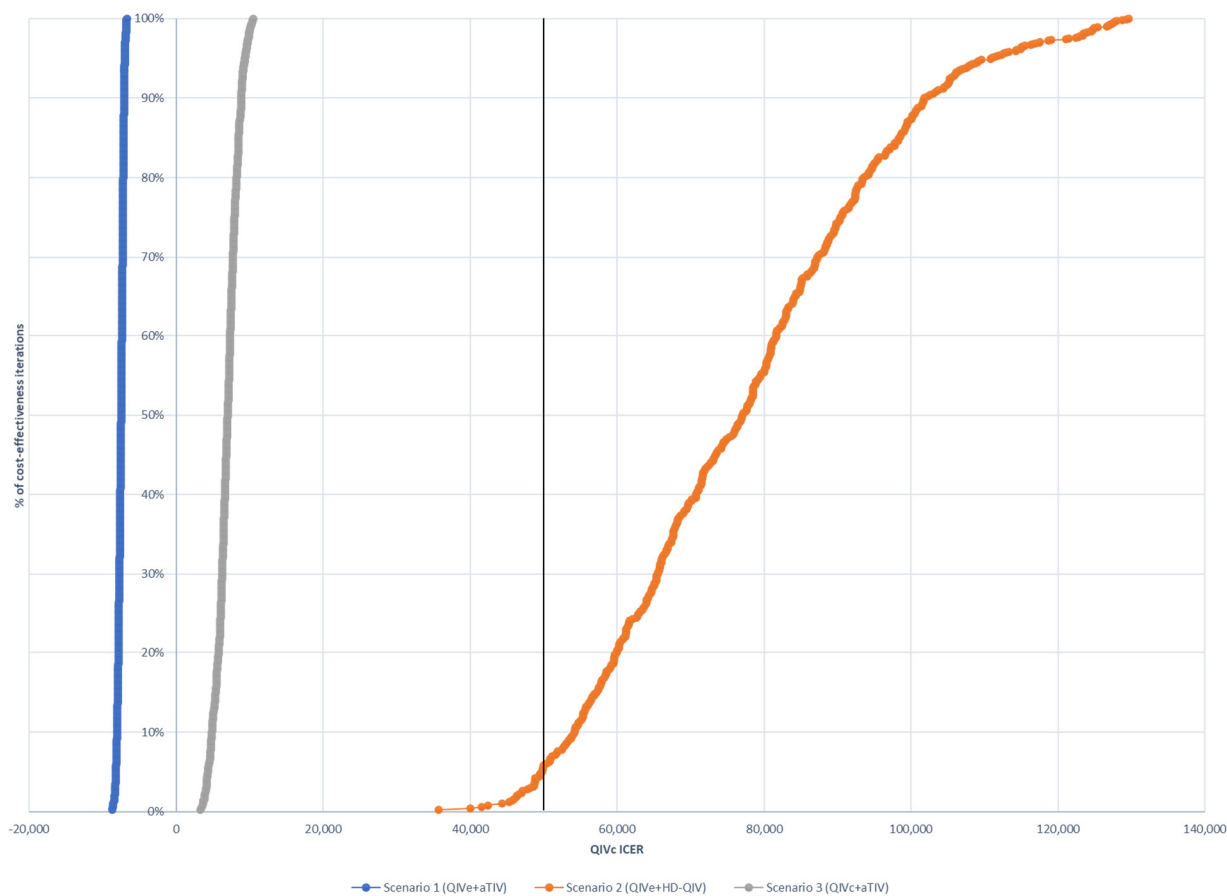

Supplement: s1 [file s1]
